# Supplementary material for: A comparative study on the removal of dyes from wastewater by nascent-state manganese dioxide and ferric hydroxide under acidic conditions
Source: Royal Society of Chemistry journal article supplement (doi:10.1039/d1ew00281c), 2021-01-01
Supplement: d1ew00281c1.pdf [file d1ew00281c1.pdf]

1 **Supplementary Material for**  
2 **A comparative study on removal of the dye wastewater by nascent**  
3 **state manganese dioxide and ferric hydroxide under acid condition**

4 Yujia Tan <sup>a</sup>, Zhiwen Cheng <sup>a</sup>, Yawei Liu <sup>a</sup>, Xiaoping Gao <sup>a</sup>, Shiqiang Liu <sup>a</sup>, Yuanyang  
5 Ren <sup>a</sup>, Zhemin Shen <sup>a,b,c\*</sup>

6 a. School of Environmental Science and Engineering, Shanghai Jiao Tong University,  
7 800 Dongchuan Road, Shanghai 200240, China.

8 b. Shanghai Institute of Pollution Control and Ecological Security, Shanghai, 200092,  
9 China.

10 c. Department of Developmental and Behavioral Pediatrics, Shanghai Children's  
11 Medical Center, Shanghai Jiao Tong University School of Medicine, Shanghai,  
12 200127, P. R China

13

14 **\*Corresponding author contact.**

15 Zhemin Shen

16 Dongchuan Road, Minhang District, Shanghai, 200240, China.

17 Tel: +86-21-54745262, Fax: +86-21-54742863

18 Email: zmshe@sjtu.edu.cn

19 **Totally 25 pages including 3 Text, 10 Tables.**

20

---

\*Corresponding author. Tel.: +86 21 54741065  
E-mail address: zmshe@sjtu.edu.cn.

21 **Text S1** Calculation details of parameters. (Page S3)  
22 **Text S2** Y test procedure. (Page S3)  
23 **Text S3** Applicability domain. (Page S3)  
24 **Table S1** The dyes used in the experiment. (Page S5)  
25 **Table S2** The inorganic compounds used in the experiment. (Page S7)  
26 **Table S3** 8 structural parameters and 20 quantum chemical parameters used in this  
27 study. (Page S8)  
28 **Table S4** The structural parameters of 38 dyes. (Page S10)  
29 **Table S5-1** The Quantum chemical descriptors of 38 dyes. (Page S12)  
30 **Table S5-2** The Quantum chemical descriptors of 38 dyes. (Page S14)  
31 **Table S6** The removal efficiency by NSMD and NSFH at pH=4. (Page S16)  
32 **Table S7** The correlation coefficients between the value of  $R_{exp}$  and the 28 selected  
33 parameters. (Page S18)  
34 **Table S8** Checking statistical data of models at pH=4. (Page S19)  
35 **Table S9** The experimental and predicted values of removal rate by NSMD. (Page  
36 S21)  
37 **Table S10** The experimental and predicted values of removal rate by NSFH. (Page  
38 S23)  
39 **References** (Page S25)  
40

#### 41 **Text S1 Calculation details of parameters**

42 A total of 20 quantum chemical parameters were calculated by using Gaussian 09  
43 and Material Studio 7.0 based on the density functional theory (DFT). In Gaussian 09,  
44 the calculation method and basis set were B3LYP and 6-311G (d,p), respectively. The  
45 parameters included the total energy of a molecule ( $E_{\text{B3LYP}}$ ), dipole moment ( $\mu$ ),  
46 energy of the highest occupied molecular orbital ( $E_{\text{HOMO}}$ ), energy of the lowest  
47 unoccupied molecular orbital ( $E_{\text{LUMO}}$ ), the gap energy ( $E_{\text{GAP}}$ ), the most positive partial  
48 charge on a hydrogen atom ( $q_{\text{H}^+}$ ), negative partial charge on a carbon atom ( $q_{\text{C}^-}$ ), and  
49 positive partial charge on a hydrogen atom linked with a carbon atom ( $q_{\text{(CH)}^+}$ ). In  
50 Material Studio 7.0, the B3LYP method was selected to match the results of Gaussian  
51 09. The maximum force, displacement and iterations were set as 0.004 Ha/Å, 500 and  
52 0.3 Å, respectively. The SCF tolerance was set to 10<sup>-6</sup> a.u. The bond order values  
53 ( $\text{BO}_n$ ,  $\text{BO}_x$ ) and Fukui indexes ( $f(+)_x/n$ ,  $f(-)_x/n$ ,  $f(0)_x/n$ ) were obtained from the out mol  
54 files. In addition, structural information to distinguish compound properties was also  
55 recorded, such as the relative molecular mass (MM) of organic compounds, the  
56 number of carbon atoms ( $N_{\text{C}}$ ), the number of hydrogen atoms ( $N_{\text{H}}$ ), the number of  
57 oxygen atoms ( $N_{\text{O}}$ ), the number of nitrogen atoms ( $N_{\text{N}}$ ), and the ratio of oxygen and  
58 carbon atoms ( $N_{\text{O:C}}$ ), the ratio of carbon and hydrogen atoms ( $N_{\text{C:H}}$ ), the ratio of  
59 nitrogen and carbon atoms ( $N_{\text{N:C}}$ ) in a molecule.

#### 60 **Text S2 Y test procedure**

61 First, the dependent variables ( $R_{\text{exp}}$ ) were rearranged in the training set twenty  
62 times randomly. Then the original independent variable matrix was kept unchanged to  
63 get 20 new models. Finally, the  $R^2$  and  $Q_{\text{INT}}^2$  values of the 20 new models were  
64 obtained according to the method mentioned above. If  $R^2$  and  $Q_{\text{INT}}^2$  of the new  
65 models are smaller than that of the original model, it means that the original model  
66 has good validity and robustness.

#### 67 **Text S3 Applicability domain**

68 According to the OECD (Organisation for Economic Co-operation and  
69 Development) principles, a QSAR model should have a defined domain of  
70 applicability [1]. The domain of application for a QSAR model describes whether the

71 model will predict an endpoint for a specific chemical with a given reliability. It helps  
72 the users of the model to judge whether the prediction for a new chemical is reliable  
73 or not, the predictions for only those compounds that fall into this domain could be  
74 considered reliable [2]. In this study, the applicability domain (APD) was visualized  
75 by using the Williams plot [3]. It helps estimate whether the compound is in the  
76 applicability domain according to the standardized residuals ( $\sigma$ ) and leverage ( $h^*$ )  
77 values, and then judge the accuracy of the prediction [4, 5]. The standardized residual  
78 ( $\sigma$ ) is defined as (S-E1).

$$\sigma = \frac{(y_i - \tilde{y}_i)}{\sqrt{\frac{\sum_{i=1}^n (y_i - \tilde{y}_i)^2}{n - 1}}} \quad (S-E1)$$

80 Where  $y_i$  is the  $R_{\text{exp}}$  value of the  $i$ th compound and  $\tilde{y}_i$  is the  $R_{\text{pre}}$  value;  $n$  is the  
81 number of compounds in the training set. Leverage can be calculated as (S-E2).

$$h_i = x_i(X^T X)^{-1} x_i^T (i = 1, 2, 3, \dots, n) \quad (S-E2)$$

83 Where  $x_i$  is the vector of descriptor for the  $i$ th compound while  $X$  is the descriptor  
84 matrix from the training set. The warning leverage ( $h^*$ ) is defined as (S-E3).

$$h^* = 3(m + 1)/n \quad (S-E3)$$

86 Where  $m$  is the number of predictor variables, and  $n$  is the number of training  
87 compounds.

**Table S1** The dyes used in the experiment.

| No.             | Dyes                        | Abbreviation | Molecular formula                                                                             | CAS No.    | Molecular mass | Purity | Source                               |
|-----------------|-----------------------------|--------------|-----------------------------------------------------------------------------------------------|------------|----------------|--------|--------------------------------------|
| 1 <sup>b</sup>  | Tris 4-aminophenyl Methanol | T4-AM        | C <sub>19</sub> H <sub>19</sub> N <sub>3</sub> O                                              | 467-62-9   | 305.37         | AR     | Sinopharm Chemical Reagent Co., Ltd. |
| 2               | Methylene Blue Trihydrate   | MBT          | C <sub>16</sub> H <sub>24</sub> ClN <sub>3</sub> O <sub>3</sub> S                             | 7220-79-3  | 373.90         | AR     | Sinopharm Chemical Reagent Co., Ltd. |
| 3               | Azure B                     | AB           | C <sub>15</sub> H <sub>16</sub> ClN <sub>3</sub> S                                            | 531-55-5   | 305.83         | AR     | Sinopharm Chemical Reagent Co., Ltd. |
| 4               | Curcumin                    | Curcumin     | C <sub>21</sub> H <sub>20</sub> O <sub>6</sub>                                                | 458-37-7   | 368.38         | AR     | Sinopharm Chemical Reagent Co., Ltd. |
| 5 <sup>a</sup>  | Basic Blue 26               | BB26         | C <sub>33</sub> H <sub>32</sub> N <sub>3</sub> Cl                                             | 2580-56-5  | 506.09         | AR     | Sinopharm Chemical Reagent Co., Ltd. |
| 6 <sup>ab</sup> | Mordant Yellow 1            | MY1          | C <sub>13</sub> H <sub>8</sub> N <sub>3</sub> NaO <sub>5</sub>                                | 584-42-9   | 309.21         | AR     | Sinopharm Chemical Reagent Co., Ltd. |
| 7 <sup>a</sup>  | Crystal Violet              | CV           | C <sub>25</sub> H <sub>30</sub> ClN <sub>3</sub>                                              | 548-62-9   | 407.99         | AR     | Sinopharm Chemical Reagent Co., Ltd. |
| 8               | Acid Orange 7               | AO7          | C <sub>16</sub> H <sub>11</sub> N <sub>2</sub> NaO <sub>4</sub> S                             | 633-96-5   | 350.32         | AR     | Sinopharm Chemical Reagent Co., Ltd. |
| 9               | Acid Orange 10              | AO10         | C <sub>16</sub> H <sub>10</sub> N <sub>2</sub> Na <sub>2</sub> O <sub>7</sub> S <sub>2</sub>  | 1936-15-8  | 452.37         | AR     | Sinopharm Chemical Reagent Co., Ltd. |
| 10              | Methyl Red                  | MR           | C <sub>15</sub> H <sub>15</sub> N <sub>3</sub> O <sub>2</sub>                                 | 493-52-7   | 269.30         | AR     | Sinopharm Chemical Reagent Co., Ltd. |
| 11 <sup>b</sup> | Fuchsin Basic               | FB           | C <sub>20</sub> H <sub>20</sub> ClN <sub>3</sub>                                              | 3248-93-9  | 301.38         | AR     | Sinopharm Chemical Reagent Co., Ltd. |
| 12 <sup>a</sup> | Mordant Black 17            | MB17         | C <sub>20</sub> H <sub>13</sub> N <sub>2</sub> O <sub>5</sub> SNa                             | 2538-85-4  | 416.39         | AR     | Sinopharm Chemical Reagent Co., Ltd. |
| 13              | Isatin                      | Isatin       | C <sub>8</sub> H <sub>5</sub> NO <sub>2</sub>                                                 | 91-56-5    | 147.13         | AR     | Sinopharm Chemical Reagent Co., Ltd. |
| 14              | Acid Sky Blue A             | ASBA         | C <sub>37</sub> H <sub>35</sub> N <sub>2</sub> NaO <sub>6</sub> S <sub>2</sub>                | 3486-30-4  | 690.80         | AR     | Sinopharm Chemical Reagent Co., Ltd. |
| 15              | Acid Chrome Blue K          | ACBK         | C <sub>16</sub> H <sub>9</sub> N <sub>2</sub> Na <sub>3</sub> O <sub>12</sub> S <sub>3</sub>  | 3270-25-5  | 586.40         | AR     | Sinopharm Chemical Reagent Co., Ltd. |
| 16 <sup>b</sup> | Eriochrome Black T          | EBT          | C <sub>20</sub> H <sub>12</sub> N <sub>3</sub> NaO <sub>7</sub> S                             | 1787-61-7  | 461.38         | AR     | Sinopharm Chemical Reagent Co., Ltd. |
| 17              | Rhodamine B                 | RB           | C <sub>28</sub> H <sub>31</sub> ClN <sub>2</sub> O <sub>3</sub>                               | 81-88-9    | 479.01         | AR     | Sinopharm Chemical Reagent Co., Ltd. |
| 18 <sup>a</sup> | Carmine                     | Carmine      | C <sub>22</sub> H <sub>20</sub> O <sub>13</sub>                                               | 1390-65-4  | 492.39         | AR     | Sinopharm Chemical Reagent Co., Ltd. |
| 19              | Metanil Yellow              | MY           | C <sub>18</sub> H <sub>14</sub> N <sub>3</sub> NaO <sub>3</sub> S                             | 587-98-4   | 375.38         | AR     | Sinopharm Chemical Reagent Co., Ltd. |
| 20              | Cresol Red                  | CR           | C <sub>21</sub> H <sub>17</sub> NaO <sub>5</sub> S                                            | 1733-12-6  | 382.43         | AR     | Sinopharm Chemical Reagent Co., Ltd. |
| 21 <sup>b</sup> | Methyl Orange               | MO           | C <sub>14</sub> H <sub>14</sub> N <sub>3</sub> NaO <sub>3</sub> S                             | 547-58-0   | 327.33         | AR     | Sinopharm Chemical Reagent Co., Ltd. |
| 22              | Reactive Black 5            | RB5          | C <sub>22</sub> H <sub>16</sub> N <sub>2</sub> O <sub>11</sub> S <sub>3</sub> Na <sub>2</sub> | 12225-25-1 | 626.55         | AR     | Sinopharm Chemical Reagent Co., Ltd. |
| 23              | Bromophenol Blue            | BB           | C <sub>19</sub> H <sub>10</sub> Br <sub>4</sub> O <sub>5</sub> S                              | 115-39-9   | 669.96         | AR     | Sinopharm Chemical Reagent Co., Ltd. |
| 24 <sup>a</sup> | Fuchsin Acid                | FA           | C <sub>20</sub> H <sub>17</sub> N <sub>3</sub> Na <sub>2</sub> O <sub>9</sub> S <sub>3</sub>  | 3244-88-0  | 585.54         | AR     | Sinopharm Chemical Reagent Co., Ltd. |

|                 |                    |        |                                  |            |        |    |                                      |
|-----------------|--------------------|--------|----------------------------------|------------|--------|----|--------------------------------------|
| 25              | Brilliant Red X 3B | BRX-3B | $C_{19}H_{10}Cl_2N_6Na_2O_7S_2$  | 17804-49-8 | 615.33 | AR | Sinopharm Chemical Reagent Co., Ltd. |
| 26 <sup>b</sup> | Acid Black 1       | AB1    | $C_{22}H_{14}N_6Na_2O_9S_2$      | 1064-48-8  | 616.49 | AR | Sinopharm Chemical Reagent Co., Ltd. |
| 27              | Ponceau S          | PS     | $C_{22}H_{12}N_4Na_4O_{13}S_4$   | 6226-79-5  | 760.57 | AR | Sinopharm Chemical Reagent Co., Ltd. |
| 28              | Acid Blue 93       | AB93   | $C_{37}H_{27}N_3Na_2O_9S_3$      | 28983-56-4 | 799.80 | AR | Sinopharm Chemical Reagent Co., Ltd. |
| 29              | Cresol Purple      | CP     | $C_{21}H_{18}O_5S$               | 2303-01-7  | 382.43 | AR | Sinopharm Chemical Reagent Co., Ltd. |
| 30 <sup>a</sup> | Indigo             | Indigo | $C_{16}H_{10}N_2O_2$             | 482-89-3   | 262.26 | AR | Sinopharm Chemical Reagent Co., Ltd. |
| 31 <sup>b</sup> | Basic Brown 1      | BB1    | $C_{18}H_{20}Cl_2N_8$            | 10114-58-6 | 419.31 | AR | Sinopharm Chemical Reagent Co., Ltd. |
| 32              | Acid Green 1       | AG1    | $C_{30}H_{15}FeN_3Na_3O_{15}S_3$ | 19381-50-1 | 878.45 | AR | Sinopharm Chemical Reagent Co., Ltd. |
| 33              | Acid Orange 74     | AO74   | $C_{16}H_{12}N_5NaO_7S$          | 10127-27-2 | 441.35 | AR | Sinopharm Chemical Reagent Co., Ltd. |
| 34              | Acid Scarlet       | AS     | $C_{18}H_{14}N_2Na_2O_7S_2$      | 3761-53-3  | 480.42 | AR | Sinopharm Chemical Reagent Co., Ltd. |
| 35              | Direct Red 28      | DR28   | $C_{32}H_{22}N_6Na_2O_6S_2$      | 573-58-0   | 696.66 | AR | Sinopharm Chemical Reagent Co., Ltd. |
| 36 <sup>b</sup> | Disperse Red 16    | DR16   | $C_{24}H_{26}IN_5O_7$            | 61968-52-3 | 519.94 | AR | Sinopharm Chemical Reagent Co., Ltd. |
| 37 <sup>a</sup> | Bromocresol Green  | BG     | $C_{21}H_{14}Br_4O_5S$           | 76-60-8    | 698.01 | AR | Sinopharm Chemical Reagent Co., Ltd. |
| 38              | Reactive Yellow 3  | RY3    | $C_{27}H_{18}ClN_8Na_3O_{10}S_3$ | 6539-67-9  | 815.09 | AR | Sinopharm Chemical Reagent Co., Ltd. |

<sup>a</sup>: Samples in the external test set at pH=4, NSMD.

<sup>b</sup>: Samples in the external test set at pH=4, NSFH.

**Table S2** The inorganic compounds used in the experiment.

| No. | Compounds                | Molecular formula               | CAS No.   | Molecular mass | Purity | Source                               |
|-----|--------------------------|---------------------------------|-----------|----------------|--------|--------------------------------------|
| 1   | Anhydrous Sodium Sulfate | Na <sub>2</sub> SO <sub>3</sub> | 7757-83-7 | 126.04         | AR     | Sinopharm Chemical Reagent Co., Ltd. |
| 2   | Potassium Permanganate   | KMnO <sub>4</sub>               | 7722-64-7 | 158.03         | AR     | Sinopharm Chemical Reagent Co., Ltd. |
| 3   | Ferric Chloride          | FeCl <sub>3</sub>               | 7705-08-0 | 162.20         | AR     | Sinopharm Chemical Reagent Co., Ltd. |
| 4   | Sodium Hydroxide         | NaOH                            | 1310-73-2 | 40.00          | AR     | Sinopharm Chemical Reagent Co., Ltd. |
| 5   | Sulfuric Acid            | H <sub>2</sub> SO <sub>4</sub>  | 7664-93-9 | 98.08          | AR     | Sinopharm Chemical Reagent Co., Ltd. |

**Table S3** 8 structural parameters and 20 quantum chemical parameters used in this study.

| No. | Descriptor                       | Note                                                                                                    | Unit     |
|-----|----------------------------------|---------------------------------------------------------------------------------------------------------|----------|
| 1   | MM                               | Relative molecular mass                                                                                 | g/mol    |
| 2   | N <sub>C</sub>                   | The number of carbon atom                                                                               | -        |
| 3   | N <sub>H</sub>                   | The number of hydrogen atom                                                                             | -        |
| 4   | N <sub>O</sub>                   | The number of oxygen atom                                                                               | -        |
| 5   | N <sub>N</sub>                   | The number of nitrogen atom                                                                             | -        |
| 6   | N <sub>O:C</sub>                 | The ratio of oxygen atom to carbon atom                                                                 | -        |
| 7   | N <sub>C:H</sub>                 | The ratio of carbon atom to hydrogen atom                                                               | -        |
| 8   | N <sub>N:C</sub>                 | The ratio of nitrogen atom to carbon atom                                                               | -        |
| 9   | E <sub>(B3LYP)</sub>             | The total energy of a molecule (E <sub>B3LYP</sub> )                                                    | kcal/mol |
| 10  | μ                                | Dipole moment                                                                                           | Debye    |
| 11  | qH <sup>+</sup>                  | The most positive partial charge on a hydrogen atom                                                     | e        |
| 12  | q(CH <sup>+</sup> ) <sub>n</sub> | Minimum value of positive partial charge on a hydrogen atom linked with a carbon atom                   | e        |
| 13  | q(CH <sup>+</sup> ) <sub>x</sub> | Maximum value of positive partial charge on a hydrogen atom linked with a carbon atom                   | e        |
| 14  | q(C <sup>-</sup> ) <sub>n</sub>  | Minimum value of negative partial charge on a carbon atom                                               | e        |
| 15  | q(C <sup>-</sup> ) <sub>x</sub>  | Maximum value of negative partial charge on a carbon atom                                               | e        |
| 16  | E <sub>HOMO</sub>                | Energy of the highest occupied molecular orbital                                                        | eV       |
| 17  | E <sub>LUMO</sub>                | Energy of the lowest unoccupied molecular orbital                                                       | eV       |
| 18  | E <sub>SUM</sub>                 | Sum of E <sub>LUMO</sub> and E <sub>HOMO</sub> , E <sub>SUM</sub> =E <sub>LUMO</sub> +E <sub>HOMO</sub> | eV       |
| 19  | E <sub>GAP</sub>                 | Gap of E <sub>LUMO</sub> and E <sub>HOMO</sub> , E <sub>GAP</sub> =E <sub>LUMO</sub> -E <sub>HOMO</sub> | eV       |
| 20  | E <sub>GAP</sub> <sup>2</sup>    | The square of E <sub>GAP</sub>                                                                          | -        |
| 21  | BO <sub>n</sub>                  | Minimum value of bond order                                                                             | -        |
| 22  | BO <sub>x</sub>                  | Maximum value of bond order                                                                             | -        |
| 23  | f(+) <sub>n</sub>                | Minimum value of nucleophilic Fukui index                                                               | e        |
| 24  | f(+) <sub>x</sub>                | Maximum value of nucleophilic Fukui index                                                               | e        |



---

|    |          |                                            |   |
|----|----------|--------------------------------------------|---|
| 25 | $f(-)_h$ | Minimum value of electrophilic Fukui index | e |
| 26 | $f(-)_x$ | Maximum value of electrophilic Fukui index | e |
| 27 | $f(0)_h$ | Minimum value of free radical Fukui index  | e |
| 28 | $f(0)_x$ | Maximum value of free radical Fukui index  | e |

---

**Table S4** The structural parameters of 38 dyes.

| No. | Dyes     | Mm     | N <sub>C</sub> | N <sub>H</sub> | N <sub>O</sub> | N <sub>N</sub> | N <sub>O:C</sub> | N <sub>C:H</sub> | N <sub>N:C</sub> |
|-----|----------|--------|----------------|----------------|----------------|----------------|------------------|------------------|------------------|
| 1   | T4-AM    | 305.37 | 19             | 19             | 1              | 3              | 0.0526           | 1.0000           | 0.1579           |
| 2   | MBT      | 373.90 | 16             | 24             | 3              | 3              | 0.1875           | 0.6667           | 0.1875           |
| 3   | AB       | 305.83 | 15             | 16             | 0              | 3              | 0.0000           | 0.9375           | 0.2000           |
| 4   | Curcumin | 368.38 | 21             | 20             | 6              | 0              | 0.2857           | 1.0500           | 0.0000           |
| 5   | BB26     | 506.09 | 33             | 32             | 0              | 3              | 0.0000           | 1.0313           | 0.0909           |
| 6   | MY1      | 309.21 | 13             | 8              | 5              | 3              | 0.3846           | 1.6250           | 0.2308           |
| 7   | CV       | 407.99 | 25             | 30             | 0              | 3              | 0.0000           | 0.8333           | 0.1200           |
| 8   | AO7      | 350.32 | 16             | 11             | 4              | 2              | 0.2500           | 1.4545           | 0.1250           |
| 9   | AO10     | 452.37 | 16             | 10             | 7              | 2              | 0.4375           | 1.6000           | 0.1250           |
| 10  | MR       | 269.30 | 15             | 15             | 2              | 3              | 0.1333           | 1.0000           | 0.2000           |
| 11  | FB       | 301.38 | 20             | 20             | 0              | 3              | 0.0000           | 1.0000           | 0.1500           |
| 12  | MB17     | 416.39 | 20             | 13             | 5              | 2              | 0.2500           | 1.5385           | 0.1000           |
| 13  | Isatin   | 147.13 | 8              | 5              | 2              | 1              | 0.2500           | 1.6000           | 0.1250           |
| 14  | ASBA     | 690.80 | 37             | 35             | 6              | 2              | 0.1622           | 1.0571           | 0.0541           |
| 15  | ACBK     | 586.40 | 16             | 10             | 7              | 2              | 0.4375           | 1.6000           | 0.1250           |
| 16  | EBT      | 461.38 | 20             | 12             | 7              | 3              | 0.3500           | 1.6667           | 0.1500           |
| 17  | RB       | 479.01 | 28             | 31             | 3              | 2              | 0.1071           | 0.9032           | 0.0714           |
| 18  | Carmin   | 492.39 | 22             | 20             | 13             | 0              | 0.5909           | 1.1000           | 0.0000           |
| 19  | MY       | 375.38 | 18             | 14             | 3              | 3              | 0.1667           | 1.2857           | 0.1667           |
| 20  | CR       | 382.43 | 21             | 17             | 5              | 0              | 0.2381           | 1.2353           | 0.0000           |
| 21  | MO       | 327.33 | 14             | 14             | 3              | 3              | 0.2143           | 1.0000           | 0.2143           |
| 22  | RB5      | 626.55 | 22             | 16             | 11             | 2              | 0.5000           | 1.3750           | 0.0909           |
| 23  | BB       | 669.96 | 19             | 10             | 5              | 0              | 0.2632           | 1.9000           | 0.0000           |
| 24  | FA       | 585.54 | 20             | 17             | 9              | 3              | 0.4500           | 1.1765           | 0.1500           |

|    |        |        |    |    |    |   |        |        |        |
|----|--------|--------|----|----|----|---|--------|--------|--------|
| 25 | BRX-3B | 615.33 | 19 | 10 | 7  | 6 | 0.3684 | 1.9000 | 0.3158 |
| 26 | AB1    | 616.49 | 22 | 14 | 9  | 6 | 0.4091 | 1.5714 | 0.2727 |
| 27 | PS     | 760.57 | 22 | 12 | 13 | 4 | 0.5909 | 1.8333 | 0.1818 |
| 28 | AB93   | 799.80 | 37 | 27 | 9  | 3 | 0.2432 | 1.3704 | 0.0811 |
| 29 | CP     | 382.43 | 21 | 18 | 5  | 0 | 0.2381 | 1.1667 | 0.0000 |
| 30 | Indigo | 262.26 | 16 | 10 | 2  | 2 | 0.1250 | 1.6000 | 0.1250 |
| 31 | BB1    | 419.31 | 18 | 20 | 0  | 8 | 0.0000 | 0.9000 | 0.4444 |
| 32 | AG1    | 878.45 | 30 | 15 | 15 | 3 | 0.5000 | 2.0000 | 0.1000 |
| 33 | AO74   | 441.35 | 16 | 12 | 7  | 5 | 0.4375 | 1.3333 | 0.3125 |
| 34 | AS     | 480.42 | 18 | 14 | 7  | 2 | 0.3889 | 1.2857 | 0.1111 |
| 35 | DR28   | 696.66 | 32 | 22 | 6  | 6 | 0.1875 | 1.4545 | 0.1875 |
| 36 | DR16   | 519.94 | 24 | 26 | 7  | 5 | 0.2917 | 0.9231 | 0.2083 |
| 37 | BG     | 698.01 | 21 | 14 | 5  | 0 | 0.2381 | 1.5000 | 0.0000 |
| 38 | RY3    | 815.09 | 27 | 18 | 10 | 8 | 0.3704 | 1.5000 | 0.2963 |

**Table S5-1** The Quantum chemical descriptors of 38 dyes.

| No. | Dyes     | $E_{(B3LYP)}$ | $\mu$   | $qH^+$ | $q(CH^+)_n$ | $q(CH^+)_x$ | $q(C^-)_n$ | $q(C^-)_x$ | $E_{HOMO}$ | $E_{LUMO}$ | $E_{SUM}$ |
|-----|----------|---------------|---------|--------|-------------|-------------|------------|------------|------------|------------|-----------|
|     |          | (a.u)         | (Debye) | (e)    | (e)         | (e)         | (e)        | (e)        | (eV)       | (eV)       | (eV)      |
| 1   | T4-AM    | -975.1907     | 3.1488  | 0.457  | 0.194       | 0.218       | -0.257     | 0.285      | -2.3021    | -2.6068    | -4.9089   |
| 2   | MBT      | -1643.4005    | 12.0854 | 0.290  | 0.191       | 0.290       | -0.366     | 0.256      | -3.7279    | -1.2844    | -5.0123   |
| 3   | AB       | -1604.0848    | 11.8733 | 0.384  | 0.187       | 0.236       | -0.367     | 0.306      | -5.2272    | -3.4667    | -8.6939   |
| 4   | Curcumin | -1263.8883    | 3.3578  | 0.480  | 0.169       | 0.219       | -0.353     | 0.484      | -6.1225    | 0.4054     | -5.7170   |
| 5   | BB26     | -1902.8361    | 9.3990  | 0.419  | 0.175       | 0.252       | -0.344     | 0.199      | -6.1442    | 0.1497     | -5.9946   |
| 6   | MY1      | -1203.0840    | 7.7001  | 0.457  | 0.198       | 0.250       | -0.297     | 0.791      | -6.1334    | -3.5538    | -9.6871   |
| 7   | CV       | -1595.4592    | 4.0784  | 0.219  | 0.174       | 0.219       | -0.350     | 0.193      | -6.2912    | 1.1456     | -5.1456   |
| 8   | AO7      | -1587.4971    | 7.9904  | 0.489  | 0.200       | 0.230       | -0.251     | 0.387      | -6.6123    | -1.2762    | -7.8885   |
| 9   | AO10     | -2373.1568    | 14.6745 | 0.491  | 0.211       | 0.266       | -0.289     | 0.406      | -6.8545    | -2.3646    | -9.2191   |
| 10  | MR       | -895.5266     | 6.1273  | 0.474  | 0.185       | 0.226       | -0.351     | 0.818      | -6.5715    | -0.2694    | -6.8408   |
| 11  | FB       | -1398.9075    | 22.1782 | 0.420  | 0.198       | 0.265       | -0.596     | 0.271      | -3.4585    | -3.7769    | -7.2354   |
| 12  | MB17     | -1816.4024    | 6.8500  | 0.490  | 0.198       | 0.240       | -0.254     | 0.381      | -6.4408    | -0.9660    | -7.4068   |
| 13  | Isatin   | -513.1963     | 5.9116  | 0.409  | 0.206       | 0.219       | -0.254     | 0.622      | -7.3687    | 0.0952     | -7.2735   |
| 14  | ASBA     | -2790.3819    | 22.4467 | 0.483  | 0.179       | 0.252       | -0.600     | 0.182      | -4.0789    | -0.3020    | -4.3810   |
| 15  | ACBK     | -3309.2926    | 5.2536  | 0.503  | 0.202       | 0.239       | -0.282     | 0.406      | -3.2109    | -2.8463    | -6.0572   |
| 16  | EBT      | -2022.1368    | 11.5672 | 0.476  | 0.188       | 0.244       | -0.252     | 0.447      | -6.1987    | -0.5170    | -6.7157   |
| 17  | RB       | -1881.4300    | 8.7880  | 0.482  | 0.190       | 0.280       | -0.581     | 0.438      | -6.2340    | -0.3270    | -6.5610   |
| 18  | Carmine  | -1828.8050    | 8.2625  | 0.510  | 0.148       | 0.238       | -0.596     | 0.814      | -6.6504    | -3.7306    | -10.3810  |
| 19  | MY       | -1645.0402    | 8.6591  | 0.383  | 0.199       | 0.238       | -0.2064    | 0.201      | -6.7130    | -0.4027    | -7.1157   |
| 20  | CR       | -1585.5559    | 4.9301  | 0.467  | 0.201       | 0.224       | -0.60-oiu5 | 0.346      | -6.7647    | 0.2993     | -6.4653   |
| 21  | MO       | -1492.4559    | 8.0654  | 0.230  | 0.186       | 0.230       | -0.351     | 0.211      | -6.6667    | -0.4354    | -7.1021   |
| 22  | RB5      | -3286.1672    | 8.8369  | 0.441  | 0.228       | 0.277       | -0.591     | 0.477      | -4.3565    | -5.4449    | -9.8014   |
| 23  | BB       | -11801.1500   | 7.6560  | 0.479  | 0.212       | 0.245       | -0.257     | 0.290      | -6.8600    | -1.8510    | -8.7110   |

|    |        |             |         |       |       |       |        |       |         |         |          |
|----|--------|-------------|---------|-------|-------|-------|--------|-------|---------|---------|----------|
| 24 | FA     | -3133.2784  | 2.5151  | 0.499 | 0.203 | 0.239 | -0.599 | 0.225 | -3.1891 | -3.3116 | -6.5007  |
| 25 | BRX-3B | -3626.9843  | 12.4315 | 0.502 | 0.206 | 0.243 | -0.231 | 0.656 | -3.5701 | -3.1755 | -6.7456  |
| 26 | AB1    | -2973.6926  | 10.0412 | 0.428 | 0.210 | 0.246 | -0.289 | 0.491 | -7.0449 | -3.8395 | -10.8844 |
| 27 | PS     | -4285.0131  | 12.4768 | 0.437 | 0.215 | 0.243 | -0.305 | 0.440 | -2.8844 | -4.2313 | -7.1157  |
| 28 | AB93   | -3787.2394  | 13.6871 | 0.499 | 0.205 | 0.243 | -0.327 | 0.244 | -7.1538 | -0.8435 | -7.9973  |
| 29 | CP     | -1585.6311  | 4.7888  | 0.463 | 0.196 | 0.236 | -0.592 | 0.356 | -6.8000 | 0.0408  | -6.7592  |
| 30 | Indigo | -875.9119   | 0.0002  | 0.434 | 0.203 | 0.215 | -0.251 | 0.507 | -7.0096 | 0.2068  | -6.8028  |
| 31 | BB1    | -1135.0034  | 4.9925  | 0.423 | 0.192 | 0.224 | -0.337 | 0.242 | -5.1374 | -1.9075 | -7.0449  |
| 32 | AG1    | -5388.7400  | 16.5020 | 0.286 | 0.259 | 0.286 | -0.222 | 0.429 | -6.3700 | -0.3810 | -6.7510  |
| 33 | AO74   | -1977.9964  | 7.5116  | 0.492 | 0.208 | 0.266 | -0.607 | 0.552 | -6.9959 | -3.4667 | -10.4626 |
| 34 | AS     | -2451.7962  | 9.1499  | 0.499 | 0.191 | 0.227 | -0.584 | 0.354 | -6.4300 | 0.1742  | -6.2558  |
| 35 | DR28   | -3134.0328  | 12.9468 | 0.396 | 0.192 | 0.262 | -0.262 | 0.262 | -6.4925 | -0.5633 | -7.0558  |
| 36 | DR16   | -2152.9718  | 10.9835 | 0.391 | 0.158 | 0.258 | -0.692 | 0.852 | -6.5823 | -3.6871 | -10.2694 |
| 37 | BG     | -11879.7800 | 6.1390  | 0.477 | 0.212 | 0.249 | -0.598 | 0.294 | -6.6970 | -1.7970 | -8.4940  |
| 38 | RY3    | -3032.0056  | 9.0962  | 0.491 | 0.210 | 0.401 | -0.279 | 0.683 | -3.2490 | -3.2463 | -6.4953  |

**Table S5-2** The Quantum chemical descriptors of 38 dyes.

| No. | Dyes     | $E_{GAP}$<br>(eV) | $E_{GAP}^2$<br>- | $BO_n$<br>- | $BO_x$<br>- | $f(+)_n$<br>(e) | $f(+)_x$<br>(e) | $f(-)_n$<br>(e) | $f(-)_x$<br>(e) | $f(0)_n$<br>(e) | $f(0)_x$<br>(e) |
|-----|----------|-------------------|------------------|-------------|-------------|-----------------|-----------------|-----------------|-----------------|-----------------|-----------------|
| 1   | T4-AM    | -0.3048           | 0.0929           | 0.9381      | 1.4235      | 0.001           | 0.049           | 0.004           | 0.080           | 0.003           | 0.051           |
| 2   | MBT      | 2.4435            | 5.9709           | 0.9081      | 1.5532      | 0.003           | 0.110           | 0.011           | 0.084           | 0.009           | 0.078           |
| 3   | AB       | 1.7606            | 3.0995           | 0.9080      | 1.5582      | 0.002           | 0.113           | 0.010           | 0.112           | 0.009           | 0.080           |
| 4   | Curcumin | 6.5279            | 42.6137          | 0.8652      | 1.8016      | 0.001           | 0.075           | 0.004           | 0.058           | 0.004           | 0.056           |
| 5   | BB26     | 6.2939            | 39.6132          | 0.9107      | 1.5019      | 0.001           | 0.084           | 0.006           | 0.045           | 0.005           | 0.045           |
| 6   | MY1      | 2.5796            | 6.6544           | 0.1034      | 1.6288      | 0.002           | 0.153           | 0.005           | 0.088           | 0.009           | 0.082           |
| 7   | CV       | 7.4368            | 55.3055          | 0.9152      | 1.4864      | 0.003           | 0.089           | 0.007           | 0.051           | 0.007           | 0.048           |
| 8   | AO7      | 5.3361            | 28.4737          | 0.1506      | 1.8294      | 0.005           | 0.113           | 0.004           | 0.077           | 0.004           | 0.077           |
| 9   | AO10     | 4.4898            | 20.1584          | 0.1031      | 1.8270      | 0.002           | 0.096           | 0.004           | 0.074           | 0.003           | 0.073           |
| 10  | MR       | 6.3021            | 39.7161          | 0.1311      | 1.8636      | 0.009           | 0.113           | 0.002           | 0.086           | 0.006           | 0.071           |
| 11  | FB       | -0.3184           | 0.1014           | 0.9467      | 1.4845      | 0.003           | 0.096           | 0.006           | 0.102           | 0.005           | 0.071           |
| 12  | MB17     | 5.4749            | 29.9740          | 0.1448      | 1.8283      | 0.005           | 0.105           | 0.005           | 0.052           | 0.005           | 0.065           |
| 13  | Isatin   | 7.4640            | 55.7110          | 0.8848      | 1.9188      | 0.026           | 0.164           | 0.020           | 0.119           | 0.035           | 0.124           |
| 14  | ASBA     | 3.7769            | 14.2649          | 0.8928      | 1.8400      | -0.002          | 0.089           | -0.003          | 0.079           | -0.002          | 0.053           |
| 15  | ACBK     | 0.3646            | 0.1330           | 0.8272      | 1.8365      | 0.004           | 0.102           | 0.003           | 0.067           | 0.003           | 0.073           |
| 16  | EBT      | 5.6817            | 32.2812          | 0.2292      | 1.8300      | 0.003           | 0.148           | 0.004           | 0.062           | 0.005           | 0.080           |
| 17  | RB       | 5.9070            | 34.8926          | 0.9620      | 1.5300      | -0.005          | 0.063           | -0.007          | 0.038           | -0.006          | 0.062           |
| 18  | Carmine  | 2.9197            | 8.5249           | 0.1254      | 1.8978      | -0.002          | 0.085           | -0.003          | 0.062           | 0.002           | 0.063           |
| 19  | MY       | 6.3102            | 39.8190          | 0.9382      | 1.8329      | 0.004           | 0.127           | 0.002           | 0.100           | 0.003           | 0.085           |
| 20  | CR       | 7.0640            | 49.8998          | 0.8053      | 1.9669      | -0.013          | 0.115           | -0.010          | 0.069           | 0.002           | 0.064           |
| 21  | MO       | 6.2313            | 38.8293          | 0.9328      | 1.8232      | 0.006           | 0.125           | 0.003           | 0.099           | 0.005           | 0.088           |
| 22  | RB5      | -1.0884           | 1.1847           | 0.7973      | 1.8947      | 0.000           | 0.087           | 0.000           | 0.082           | 0.000           | 0.063           |
| 23  | BB       | 5.0090            | 25.0901          | 0.9500      | 1.4150      | -0.008          | 0.095           | -0.010          | 0.039           | 0.002           | 0.053           |

|    |        |         |         |        |        |        |       |        |       |        |       |
|----|--------|---------|---------|--------|--------|--------|-------|--------|-------|--------|-------|
| 24 | FA     | -0.1224 | 0.0150  | 0.1005 | 1.9097 | 0.002  | 0.103 | 0.002  | 0.090 | 0.003  | 0.085 |
| 25 | BRX-3B | 0.3946  | 0.1557  | 0.2293 | 1.8445 | 0.007  | 0.084 | 0.001  | 0.160 | 0.005  | 0.088 |
| 26 | AB1    | 3.2055  | 10.2749 | 0.1051 | 1.8392 | 0.003  | 0.078 | 0.004  | 0.062 | 0.003  | 0.047 |
| 27 | PS     | -1.3469 | 1.8143  | 0.1417 | 1.7902 | 0.001  | 0.087 | 0.002  | 0.136 | 0.002  | 0.073 |
| 28 | AB93   | 6.3102  | 39.8190 | 0.8733 | 1.9361 | 0.000  | 0.084 | 0.002  | 0.063 | 0.001  | 0.064 |
| 29 | CP     | 6.8408  | 46.7972 | 0.7973 | 1.9465 | -0.009 | 0.101 | -0.011 | 0.069 | 0.003  | 0.057 |
| 30 | Indigo | 7.2164  | 52.0758 | 0.9396 | 1.7672 | 0.012  | 0.096 | 0.008  | 0.071 | 0.015  | 0.080 |
| 31 | BB1    | 3.2299  | 10.4325 | 0.8921 | 1.6153 | 0.003  | 0.078 | 0.007  | 0.048 | 0.006  | 0.053 |
| 32 | AG1    | 5.9890  | 35.8681 | 0.6380 | 1.6190 | -0.050 | 0.056 | -0.030 | 0.057 | -0.060 | 0.057 |
| 33 | AO74   | 3.5293  | 12.4557 | 0.1305 | 1.8315 | 0.001  | 0.143 | 0.003  | 0.091 | 0.004  | 0.082 |
| 34 | AS     | 6.6041  | 43.6143 | 0.8274 | 1.8532 | 0.003  | 0.114 | 0.004  | 0.068 | 0.004  | 0.090 |
| 35 | DR28   | 5.9293  | 35.1563 | 0.9240 | 1.8159 | 0.002  | 0.077 | 0.004  | 0.053 | 0.003  | 0.052 |
| 36 | DR16   | 2.8953  | 8.3825  | 0.2245 | 1.8366 | 0.000  | 0.129 | 0.001  | 0.099 | 0.001  | 0.074 |
| 37 | BG     | 4.9000  | 24.0100 | 0.9540 | 1.4190 | -0.012 | 0.071 | -0.009 | 0.035 | 0.002  | 0.056 |
| 38 | RY3    | 0.0027  | 0.0000  | 0.8418 | 1.9493 | 0.000  | 0.083 | 0.000  | 0.154 | 0.000  | 0.096 |

**Table S6** The removal efficiency by NSMD and NSFH at pH=4.

| No. | Dyes     | $\lambda_{\max}$ | NSFH             |              | NSMD             |              |
|-----|----------|------------------|------------------|--------------|------------------|--------------|
|     |          |                  | $R_{\text{exp}}$ | error        | $R_{\text{exp}}$ | error        |
| 1   | T4-AM    | 538              | 0.0054           | $\pm 0.0014$ | 0.8993           | $\pm 0.0538$ |
| 2   | MBT      | 661              | 0.1065           | $\pm 0.0209$ | 0.9984           | $\pm 0.0014$ |
| 3   | AB       | 605              | 0.1184           | $\pm 0.0141$ | 0.9315           | $\pm 0.0238$ |
| 4   | Curcumin | 264              | 0.1865           | $\pm 0.0398$ | 0.7891           | $\pm 0.0481$ |
| 5   | BB26     | 615              | 0.2096           | $\pm 0.0321$ | 0.9623           | $\pm 0.0218$ |
| 6   | MY1      | 352              | 0.2528           | $\pm 0.0612$ | 0.6956           | $\pm 0.1241$ |
| 7   | CV       | 589              | 0.2657           | $\pm 0.0475$ | 0.9996           | $\pm 0.0002$ |
| 8   | AO7      | 484              | 0.2743           | $\pm 0.0398$ | 0.8287           | $\pm 0.0034$ |
| 9   | AO10     | 477              | 0.2876           | $\pm 0.0022$ | 0.8728           | $\pm 0.0532$ |
| 10  | MR       | 265              | 0.2894           | $\pm 0.0413$ | 0.7328           | $\pm 0.0734$ |
| 11  | FB       | 541              | 0.3154           | $\pm 0.0053$ | 0.9998           | $\pm 0.0002$ |
| 12  | MB17     | 438              | 0.3170           | $\pm 0.0374$ | 0.8129           | $\pm 0.0193$ |
| 13  | Isatin   | 301              | 0.3178           | $\pm 0.0572$ | 0.6521           | $\pm 0.0323$ |
| 14  | ASBA     | 600              | 0.3623           | $\pm 0.0133$ | 0.9856           | $\pm 0.0108$ |
| 15  | ACBK     | 542              | 0.3654           | $\pm 0.0322$ | 0.7312           | $\pm 0.0165$ |
| 16  | EBT      | 614              | 0.3678           | $\pm 0.0793$ | 0.9461           | $\pm 0.0485$ |
| 17  | RB       | 553              | 0.3765           | $\pm 0.0281$ | 0.9732           | $\pm 0.0211$ |
| 18  | Carmines | 506              | 0.3949           | $\pm 0.0133$ | 0.7621           | $\pm 0.0681$ |
| 19  | MY       | 444              | 0.3975           | $\pm 0.0740$ | 0.8864           | $\pm 0.1120$ |
| 20  | CR       | 435              | 0.4316           | $\pm 0.0290$ | 0.7087           | $\pm 0.0243$ |
| 21  | MO       | 463              | 0.4373           | $\pm 0.0633$ | 0.7844           | $\pm 0.0293$ |
| 22  | RB5      | 597              | 0.4537           | $\pm 0.0276$ | 0.6521           | $\pm 0.0198$ |
| 23  | BB       | 437              | 0.4740           | $\pm 0.0557$ | 0.8756           | $\pm 0.0281$ |



|               |        |     |        |         |        |         |
|---------------|--------|-----|--------|---------|--------|---------|
| 24            | FA     | 544 | 0.4765 | ±0.0032 | 0.5431 | ±0.0219 |
| 25            | BRX-3B | 537 | 0.4985 | ±0.0465 | 0.8533 | ±0.0593 |
| 26            | AB1    | 618 | 0.5090 | ±0.0355 | 0.7983 | ±0.0298 |
| 27            | PS     | 506 | 0.5342 | ±0.0576 | 0.7966 | ±0.0568 |
| 28            | AB93   | 626 | 0.5437 | ±0.0215 | 0.8624 | ±0.0281 |
| 29            | CP     | 433 | 0.5673 | ±0.0475 | 0.6733 | ±0.0438 |
| 30            | Indigo | 609 | 0.5673 | ±0.0086 | 0.8943 | ±0.0548 |
| 31            | BB1    | 462 | 0.5846 | ±0.0681 | 0.8477 | ±0.0981 |
| 32            | AG1    | 285 | 0.6358 | ±0.0772 | 0.9942 | ±0.0027 |
| 33            | AO74   | 479 | 0.6754 | ±0.0391 | 0.6425 | ±0.0472 |
| 34            | AS     | 510 | 0.6855 | ±0.0281 | 0.9136 | ±0.0812 |
| 35            | DR28   | 599 | 0.7266 | ±0.0387 | 0.8854 | ±0.0483 |
| 36            | DR16   | 462 | 0.7469 | ±0.0714 | 0.7545 | ±0.0958 |
| 37            | BG     | 616 | 0.7544 | ±0.0775 | 0.8645 | ±0.0412 |
| 38            | RY3    | 424 | 0.8674 | ±0.0576 | 0.9576 | ±0.0281 |
| Average value | -      | -   | 0.4311 | ±0.0417 | 0.8358 | ±0.0596 |

**Table S7** The correlation coefficients between the value of  $R_{exp}$  and the 28 selected parameters.

| No. | Parameters    | Pearson Correlation coefficient |         |
|-----|---------------|---------------------------------|---------|
|     |               | NSMD                            | NSFH    |
| 1   | $BO_x$        | -0.610**                        | 0.331   |
| 2   | $N_{O:C}$     | -0.482**                        | 0.364*  |
| 3   | $q(C^-)_x$    | -0.478**                        | 0.184   |
| 4   | $f(0)_x$      | -0.411**                        | 0.084   |
| 5   | $f(-)_x$      | -0.398*                         | 0.074   |
| 6   | $qH^+$        | -0.357*                         | 0.130   |
| 7   | $N_O$         | -0.342*                         | 0.481** |
| 8   | $f(+)_x$      | -0.300                          | -0.076  |
| 9   | $q(CH^+)_x$   | -0.246                          | 0.381*  |
| 10  | $f(0)_n$      | -0.231                          | -0.262  |
| 11  | $f(+)_n$      | -0.201                          | -0.270  |
| 12  | $N_{N:C}$     | -0.168                          | 0.179   |
| 13  | $N_{C:H}$     | -0.167                          | 0.356*  |
| 14  | $N_N$         | -0.116                          | 0.356*  |
| 15  | $q(CH^+)_n$   | -0.112                          | 0.289   |
| 16  | $E_{(B3LPY)}$ | -0.074                          | -0.399* |
| 17  | $E_{HOMO}$    | -0.070                          | -0.181  |
| 18  | $f(-)_n$      | -0.050                          | -0.383* |
| 19  | MM            | -0.033                          | 0.583** |
| 20  | $\mu$         | 0.432**                         | 0.043   |
| 21  | $N_H$         | 0.378*                          | -0.085  |
| 22  | $E_{LUMO}$    | 0.372*                          | -0.116  |
| 23  | $BO_n$        | 0.334                           | -0.035  |
| 24  | $E_{SUM}$     | 0.322                           | -0.286  |
| 25  | $N_C$         | 0.276                           | 0.273   |
| 26  | $E_{GAP}$     | 0.268                           | 0.027   |
| 27  | $E_{GAP}^2$   | 0.204                           | 0.018   |
| 28  | $q(C^-)_n$    | 0.163                           | -0.245  |

Note: ‘\*\*\*’ and ‘\*’ indicate that when the confidence level are 0.01 and 0.05, the correlation is statistically significant.

**Table S8** Checking statistical data of models at pH=4.

| Model No. | Variables                        | Regression coefficients | t     | Sig.  | VIF   |
|-----------|----------------------------------|-------------------------|-------|-------|-------|
| M-1       | BO <sub>x</sub>                  | -0.422                  | 5.408 | 0.000 | 1.024 |
|           | μ                                | 0.016                   | 5.794 | 0.000 | 1.126 |
|           | q(CH <sup>+</sup> ) <sub>x</sub> | -1.589                  | 4.233 | 0.000 | 1.106 |
| M-2       | BO <sub>x</sub>                  | -0.460                  | 7.031 | 0.000 | 1.051 |
|           | μ                                | 0.017                   | 7.210 | 0.000 | 1.130 |
|           | q(CH <sup>+</sup> ) <sub>x</sub> | -1.248                  | 3.842 | 0.001 | 1.209 |
|           | E <sub>LUMO</sub>                | 0.024                   | 3.601 | 0.001 | 1.147 |
| M-3       | BO <sub>x</sub>                  | -0.426                  | 6.183 | 0.000 | 1.207 |
|           | μ                                | 0.017                   | 7.440 | 0.000 | 1.141 |
|           | q(CH <sup>+</sup> ) <sub>x</sub> | -1.185                  | 3.680 | 0.001 | 1.233 |
|           | E <sub>LUMO</sub>                | 0.020                   | 2.752 | 0.011 | 1.390 |
|           | f(-) <sub>x</sub>                | -0.553                  | 1.385 | 0.179 | 1.440 |
| M-4       | BO <sub>x</sub>                  | -0.368                  | 4.860 | 0.000 | 1.556 |
|           | μ                                | 0.016                   | 7.364 | 0.000 | 1.166 |
|           | q(CH <sup>+</sup> ) <sub>x</sub> | -1.283                  | 4.041 | 0.001 | 1.279 |
|           | E <sub>LUMO</sub>                | 0.037                   | 2.914 | 0.008 | 4.639 |
|           | f(-) <sub>x</sub>                | -0.682                  | 1.729 | 0.097 | 1.501 |
|           | E <sub>GAP</sub> <sup>2</sup>    | -0.002                  | 1.621 | 0.119 | 5.778 |
| F-1       | MM                               | 0.001                   | 7.362 | 0.000 | 1.832 |
|           | μ                                | -0.016                  | 3.013 | 0.006 | 1.363 |
|           | f(0) <sub>x</sub>                | 5.255                   | 3.679 | 0.001 | 1.266 |
|           | E <sub>HOMO</sub>                | -0.058                  | 3.355 | 0.003 | 1.338 |
| F-2       | MM                               | 0.001                   | 7.950 | 0.000 | 1.836 |
|           | μ                                | -0.015                  | 2.996 | 0.006 | 1.376 |

|           |                   |        |        |       |       |
|-----------|-------------------|--------|--------|-------|-------|
|           | $f(0)_x$          | 5.865  | 4.285  | 0.000 | 1.325 |
|           | $E_{\text{HOMO}}$ | -0.060 | 3.739  | 0.001 | 1.347 |
|           | $q(C)_n$          | -0.291 | 2.117  | 0.045 | 1.057 |
|           | MM                | 0.001  | 7.875  | 0.000 | 1.990 |
|           | $\mu$             | -0.017 | 3.759  | 0.001 | 1.404 |
| F-3       | $f(0)_x$          | 4.674  | 3.649  | 0.001 | 1.490 |
|           | $E_{\text{HOMO}}$ | -0.072 | 4.848  | 0.000 | 1.460 |
|           | $q(C)_n$          | -0.413 | 3.205  | 0.004 | 1.194 |
|           | $N_N$             | 0.034  | 2.797  | 0.010 | 1.781 |
| Criterion | -                 | -      | >2.045 | <0.05 | <5    |

**Table S9** The experimental and predicted values of removal rate by NSMD.

| No. | Dyes     | $R_{exp}$ | Model M-1 |         | Model M-2 |         | Model M-3 |         | Model M-4 |         |
|-----|----------|-----------|-----------|---------|-----------|---------|-----------|---------|-----------|---------|
|     |          |           | $R_{pre}$ | Diff.   | $R_{pre}$ | Diff.   | $R_{pre}$ | Diff.   | $R_{pre}$ | Diff.   |
| 1   | T4-AM    | 0.8993    | 0.4967    | 0.0391  | 0.5086    | 0.0510  | 0.4880    | 0.0304  | 0.4916    | 0.0340  |
| 2   | MBT      | 0.9984    | 0.6656    | 0.1225  | 0.6155    | 0.0724  | 0.6190    | 0.0759  | 0.6499    | 0.1068  |
| 3   | AB       | 0.9315    | 0.7356    | 0.0931  | 0.6990    | 0.0565  | 0.7016    | 0.0591  | 0.6927    | 0.0502  |
| 4   | Curcumin | 0.7891    | 0.7479    | 0.0958  | 0.7758    | 0.1237  | 0.7487    | 0.0966  | 0.7214    | 0.0693  |
| 5   | BB26     | 0.9623    | 0.7127    | 0.0606  | 0.6313    | -0.0208 | 0.6496    | -0.0025 | 0.6320    | -0.0201 |
| 6   | MY1      | 0.6956    | 0.6912    | 0.0179  | 0.7215    | 0.0482  | 0.7242    | 0.0509  | 0.7214    | 0.0481  |
| 7   | CV       | 0.9996    | 0.8496    | 0.1540  | 0.8134    | 0.1178  | 0.8100    | 0.1144  | 0.8012    | 0.1056  |
| 8   | AO7      | 0.8287    | 0.7039    | -0.0048 | 0.7357    | 0.0270  | 0.7373    | 0.0286  | 0.7349    | 0.0262  |
| 9   | AO10     | 0.8728    | 0.7403    | 0.0091  | 0.7069    | -0.0243 | 0.7188    | -0.0124 | 0.7533    | 0.0221  |
| 10  | MR       | 0.7328    | 0.7635    | 0.0307  | 0.7874    | 0.0546  | 0.7785    | 0.0457  | 0.7772    | 0.0444  |
| 11  | FB       | 0.9998    | 0.8017    | 0.0472  | 0.7604    | 0.0059  | 0.7591    | 0.0046  | 0.7511    | -0.0034 |
| 12  | MB17     | 0.8129    | 0.7641    | 0.0020  | 0.7099    | -0.0522 | 0.7301    | -0.0320 | 0.7341    | -0.0280 |
| 13  | Isatin   | 0.6521    | 0.8052    | 0.0208  | 0.8300    | 0.0456  | 0.8134    | 0.0290  | 0.8047    | 0.0203  |
| 14  | ASBA     | 0.9856    | 0.7565    | -0.0326 | 0.7938    | 0.0047  | 0.7951    | 0.0060  | 0.8030    | 0.0139  |
| 15  | ACBK     | 0.7312    | 0.8690    | 0.0724  | 0.8128    | 0.0162  | 0.7907    | -0.0059 | 0.7791    | -0.0175 |
| 16  | EBT      | 0.9461    | 0.8046    | 0.0063  | 0.7545    | -0.0438 | 0.7736    | -0.0247 | 0.7663    | -0.0320 |
| 17  | RB       | 0.9732    | 0.7677    | -0.0452 | 0.7817    | -0.0312 | 0.7941    | -0.0188 | 0.8007    | -0.0122 |
| 18  | Carmin   | 0.7621    | 0.8014    | -0.0273 | 0.8056    | -0.0231 | 0.8049    | -0.0238 | 0.8059    | -0.0228 |
| 19  | MY       | 0.8864    | 0.8533    | 0.0056  | 0.8455    | -0.0022 | 0.8556    | 0.0079  | 0.8769    | 0.0292  |
| 20  | CR       | 0.7087    | 0.8454    | -0.0079 | 0.8124    | -0.0409 | 0.7746    | -0.0787 | 0.7844    | -0.0689 |
| 21  | MO       | 0.7844    | 0.8268    | -0.0356 | 0.8476    | -0.0148 | 0.8572    | -0.0052 | 0.8439    | -0.0185 |
| 22  | RB5      | 0.6521    | 0.9147    | 0.0502  | 0.9267    | 0.0622  | 0.9385    | 0.0740  | 0.9212    | 0.0567  |
| 23  | BB       | 0.8756    | 0.8521    | -0.0207 | 0.8493    | -0.0235 | 0.8567    | -0.0161 | 0.8459    | -0.0269 |

|    |        |        |        |         |        |         |        |         |        |         |
|----|--------|--------|--------|---------|--------|---------|--------|---------|--------|---------|
| 24 | FA     | 0.5431 | 0.9471 | 0.0715  | 0.9581 | 0.0825  | 0.9675 | 0.0919  | 0.9452 | 0.0696  |
| 25 | BRX-3B | 0.8533 | 0.8355 | -0.0499 | 0.8733 | -0.0121 | 0.8845 | -0.0009 | 0.8785 | -0.0069 |
| 26 | AB1    | 0.7983 | 0.7979 | -0.0885 | 0.8264 | -0.0600 | 0.8100 | -0.0764 | 0.7989 | -0.0875 |
| 27 | PS     | 0.7966 | 0.7236 | -0.1707 | 0.7527 | -0.1416 | 0.7463 | -0.1480 | 0.7319 | -0.1624 |
| 28 | AB93   | 0.8624 | 0.9143 | 0.0150  | 0.8931 | -0.0062 | 0.8814 | -0.0179 | 0.8986 | -0.0007 |
| 29 | CP     | 0.6733 | 0.8146 | -0.0990 | 0.8530 | -0.0606 | 0.8520 | -0.0616 | 0.8490 | -0.0646 |
| 30 | Indigo | 0.8943 | 0.9684 | 0.0369  | 0.9363 | 0.0048  | 0.9161 | -0.0154 | 0.9059 | -0.0256 |
| 31 | BB1    | 0.8477 | 0.8361 | -0.1100 | 0.8669 | -0.0792 | 0.8723 | -0.0738 | 0.8756 | -0.0705 |
| 32 | AG1    | 0.9942 | 0.9272 | -0.0351 | 0.9870 | 0.0247  | 0.9885 | 0.0262  | 0.9730 | 0.0107  |
| 33 | AO74   | 0.6425 | 0.8610 | -0.1122 | 0.9173 | -0.0559 | 0.9273 | -0.0459 | 0.9135 | -0.0597 |
| 34 | AS     | 0.9136 | 0.9932 | 0.0076  | 1.0424 | 0.0568  | 1.0384 | 0.0528  | 1.0681 | 0.0825  |
| 35 | DR28   | 0.8854 | 0.9374 | -0.0568 | 0.9987 | 0.0045  | 1.0018 | 0.0076  | 0.9796 | -0.0146 |
| 36 | DR16   | 0.7545 | 0.8881 | -0.1103 | 0.9272 | -0.0712 | 0.9170 | -0.0814 | 0.9360 | -0.0624 |
| 37 | BG     | 0.8645 | 0.9010 | -0.0986 | 0.9688 | -0.0308 | 0.9603 | -0.0393 | 0.9373 | -0.0623 |
| 38 | RY3    | 0.4576 | 1.1183 | 0.1185  | 1.1018 | 0.1020  | 1.0877 | 0.0879  | 1.0620 | 0.0622  |

**Table S10** The experimental and predicted values of removal rate by NSFH.

| No. | Dyes     | $R_{exp}$ | Model F-1 |         | Model F-2 |         | Model F-3 |         |
|-----|----------|-----------|-----------|---------|-----------|---------|-----------|---------|
|     |          |           | $R_{pre}$ | Diff.   | $R_{pre}$ | Diff.   | $R_{pre}$ | Diff.   |
| 1   | T4-AM    | 0.0054    | -0.0555   | -0.0609 | -0.1318   | -0.1372 | -0.0849   | -0.0903 |
| 2   | MBT      | 0.1065    | 0.0946    | -0.0119 | 0.0783    | -0.0282 | 0.1056    | -0.0009 |
| 3   | AB       | 0.1184    | 0.1274    | 0.0090  | 0.1154    | -0.0030 | 0.1588    | 0.0404  |
| 4   | Curcumin | 0.1865    | 0.2520    | 0.0655  | 0.2145    | 0.0280  | 0.2106    | 0.0241  |
| 5   | BB26     | 0.2096    | 0.2365    | 0.0269  | 0.1958    | -0.0138 | 0.2941    | 0.0845  |
| 6   | MY1      | 0.2528    | 0.2607    | 0.0079  | 0.2271    | -0.0257 | 0.2788    | 0.0260  |
| 7   | CV       | 0.2657    | 0.2479    | -0.0178 | 0.2057    | -0.0600 | 0.3135    | 0.0478  |
| 8   | AO7      | 0.2743    | 0.2986    | 0.0243  | 0.2498    | -0.0245 | 0.2731    | -0.0012 |
| 9   | AO10     | 0.2876    | 0.2868    | -0.0008 | 0.2538    | -0.0338 | 0.2760    | -0.0116 |
| 10  | MR       | 0.2894    | 0.2135    | -0.0759 | 0.1882    | -0.1012 | 0.2681    | -0.0213 |
| 11  | FB       | 0.3154    | -0.1918   | -0.5072 | -0.1359   | -0.4513 | -0.0956   | -0.4110 |
| 12  | MB17     | 0.3170    | 0.3099    | -0.0071 | 0.2532    | -0.0638 | 0.2914    | -0.0256 |
| 13  | Isatin   | 0.3178    | 0.4196    | 0.1018  | 0.3998    | 0.0820  | 0.3467    | 0.0289  |
| 14  | ASBA     | 0.3623    | 0.1347    | -0.2276 | 0.1823    | -0.1800 | 0.2174    | -0.1449 |
| 15  | ACBK     | 0.3654    | 0.3602    | -0.0052 | 0.3085    | -0.0569 | 0.3049    | -0.0605 |
| 16  | EBT      | 0.3678    | 0.3442    | -0.0236 | 0.3003    | -0.0675 | 0.3420    | -0.0258 |
| 17  | RB       | 0.3765    | 0.3138    | -0.0627 | 0.3519    | -0.0246 | 0.4272    | 0.0507  |
| 18  | Carmin   | 0.3949    | 0.3650    | -0.0299 | 0.4084    | 0.0135  | 0.4224    | 0.0275  |
| 19  | MY       | 0.3975    | 0.3609    | -0.0366 | 0.3216    | -0.0759 | 0.3708    | -0.0267 |
| 20  | CR       | 0.4316    | 0.3202    | -0.1114 | 0.3638    | -0.0678 | 0.3857    | -0.0459 |
| 21  | MO       | 0.4373    | 0.3354    | -0.1019 | 0.3226    | -0.1147 | 0.3795    | -0.0578 |
| 22  | RB5      | 0.4537    | 0.3569    | -0.0968 | 0.3949    | -0.0588 | 0.4475    | -0.0062 |
| 23  | BB       | 0.4740    | 0.5119    | 0.0379  | 0.4504    | -0.0236 | 0.4386    | -0.0354 |

---

|    |        |        |        |         |        |         |        |         |
|----|--------|--------|--------|---------|--------|---------|--------|---------|
| 24 | FA     | 0.4765 | 0.4649 | -0.0116 | 0.5100 | 0.0335  | 0.5701 | 0.0936  |
| 25 | BRX-3B | 0.4985 | 0.3739 | -0.1246 | 0.3244 | -0.1741 | 0.4228 | -0.0757 |
| 26 | AB1    | 0.5090 | 0.3994 | -0.1096 | 0.3463 | -0.1627 | 0.5471 | 0.0381  |
| 27 | PS     | 0.5342 | 0.3998 | -0.1344 | 0.3614 | -0.1728 | 0.4103 | -0.1239 |
| 28 | AB93   | 0.5437 | 0.6200 | 0.0763  | 0.5922 | 0.0485  | 0.6694 | 0.1257  |
| 29 | CP     | 0.5673 | 0.2877 | -0.2796 | 0.3232 | -0.2441 | 0.3525 | -0.2148 |
| 30 | Indigo | 0.5673 | 0.3772 | -0.1901 | 0.3231 | -0.2442 | 0.3635 | -0.2038 |
| 31 | BB1    | 0.5846 | 0.2039 | -0.3807 | 0.1596 | -0.4250 | 0.4142 | -0.1704 |
| 32 | AG1    | 0.6358 | 0.5714 | -0.0644 | 0.5100 | -0.1258 | 0.5677 | -0.0681 |
| 33 | AO74   | 0.6754 | 0.4458 | -0.2296 | 0.5040 | -0.1714 | 0.6723 | -0.0031 |
| 34 | AS     | 0.6855 | 0.4679 | -0.2176 | 0.5248 | -0.1607 | 0.5687 | -0.1168 |
| 35 | DR28   | 0.7266 | 0.4273 | -0.2993 | 0.3712 | -0.3554 | 0.5503 | -0.1763 |
| 36 | DR16   | 0.7469 | 0.4028 | -0.3441 | 0.4835 | -0.2634 | 0.6598 | -0.0871 |
| 37 | BG     | 0.7544 | 0.5705 | -0.1839 | 0.6082 | -0.1462 | 0.6355 | -0.1189 |
| 38 | RY3    | 0.8674 | 0.6505 | -0.2169 | 0.6158 | -0.2516 | 0.7813 | -0.0861 |

---



## References

- [1] OECD, Guidance Document On The Validation of (Quantitative) Structure-activity Relationships [(Q)SAR] Models., (2007).
- [2] G. Melagraki, A. Afantitis, Enalos InSilicoNano platform: an online decision support tool for the design and virtual screening of nanoparticles, RSC Advances, 4 (2014) 50713-50725.
- [3] P. Gramatica, Principles of QSAR models validation: internal and external, QSAR & Combinatorial Science, 26 (2007) 694-701.
- [4] S. Gupta, N. Basant, Modeling the pH and temperature dependence of aqueousphase hydroxyl radical reaction rate constants of organic micropollutants using QSPR approach, Environmental Science and Pollution Research, 24 (2017) 24936-24946.
- [5] E.V. Ortiz, D.O. Bennardi, D.E. Baceo, S.E. Fioressi, P.R. Duchowicz, The conformation-independent QSPR approach for predicting the oxidation rate constant of water micropollutants, Environmental Science and Pollution Research, 24 (2017) 27366-27375.
